# Supplementary material for: Anion-controlled structures and luminescent properties of three Cd(ii) complexes assembled by a 2-substituted 8-hydroxyquinoline ligand
Source: Royal Society of Chemistry journal article supplement (doi:10.1039/c3ce40348c), 2013-01-01

Supporting Information for  
**Anion-Controlled Structures and Luminescent Properties of  
Three Cd(II) Complexes Assembled by a 2-Substituted  
8-Hydroxyquinoline Ligand**

*Guozan Yuan\**, *Lulu Rong*, *Xuelong Qiao*, *Li Ma*, *Xianwen Wei\**

*\*School of Chemistry and Chemical Engineering, Anhui University of Technology,  
Maanshan 243002, China. Fax: +86 555 2311552; Tel: +86 555 2311807*

\*E-mail: guozan@ahut.edu.cn (Guozan Yuan); xww@ahut.edu.cn (Xianwen Wei)

**Table of Content**

1. **Table S1-3.** Selected Bond lengths [Å] and angles [°] for **1-3**.
2. **Fig. S1-6.** View of supramolecular structures of **1**
3. **Fig. S7-9.** View of supramolecular structures of **2**
4. **Fig. S10-12.** View of supramolecular structures of **3**

**1.1. Table S1. Selected Bond lengths [Å] and angles [°] for 1.**

---

|            |          |
|------------|----------|
| Cd(1)-O(2) | 2.256(3) |
| Cd(1)-O(1) | 2.261(3) |

|            |          |
|------------|----------|
| Cd(1)-O(3) | 2.359(4) |
| Cd(1)-O(4) | 2.365(3) |
| Cd(1)-N(1) | 2.397(3) |
| Cd(1)-N(2) | 2.438(3) |

|                  |            |
|------------------|------------|
| O(2)-Cd(1)-O(1)  | 177.68(9)  |
| O(2)-Cd(1)-O(3)  | 94.36(14)  |
| O(1)-Cd(1)-O(3)  | 87.67(13)  |
| O(2)-Cd(1)-O(4)  | 85.70(12)  |
| O(1)-Cd(1)-O(4)  | 95.44(12)  |
| O(3)-Cd(1)-O(4)  | 89.72(15)  |
| O(2)-Cd(1)-N(1)  | 105.81(10) |
| O(1)-Cd(1)-N(1)  | 72.05(9)   |
| O(3)-Cd(1)-N(1)  | 158.88(14) |
| O(4)-Cd(1)-N(1)  | 97.80(12)  |
| O(2)-Cd(1)-N(2)  | 71.26(10)  |
| O(1)-Cd(1)-N(2)  | 107.55(10) |
| O(3)-Cd(1)-N(2)  | 92.78(13)  |
| O(4)-Cd(1)-N(2)  | 156.95(12) |
| N(1)-Cd(1)-N(2)  | 87.98(9)   |
| C(1)-O(1)-Cd(1)  | 116.8(2)   |
| C(9)-N(1)-C(6)   | 120.4(3)   |
| C(9)-N(1)-Cd(1)  | 127.6(2)   |
| C(6)-N(1)-Cd(1)  | 111.7(2)   |
| O(1)-C(1)-C(2)   | 122.6(4)   |
| O(1)-C(1)-C(6)   | 120.6(3)   |
| C(2)-C(1)-C(6)   | 116.8(4)   |
| C(18)-O(2)-Cd(1) | 117.8(2)   |
| C(26)-N(2)-C(23) | 119.8(3)   |
| C(26)-N(2)-Cd(1) | 128.3(2)   |
| C(23)-N(2)-Cd(1) | 111.5(2)   |

---

**1.2. Table S2. Selected Bond lengths [Å] and angles [°] for 2.**

|            |          |
|------------|----------|
| Cd(1)-O(1) | 2.203(3) |
| Cd(1)-O(2) | 2.232(3) |

|              |          |
|--------------|----------|
| Cd(1)-N(2)   | 2.322(4) |
| Cd(1)-N(1)   | 2.388(4) |
| Cd(1)-O(3)   | 2.425(3) |
| Cd(1)-O(3)#1 | 2.435(3) |
| Cd(2)-O(4A)  | 2.237(9) |
| Cd(2)-O(2)   | 2.240(3) |
| Cd(2)-O(1)#1 | 2.246(3) |
| Cd(2)-O(5A)  | 2.262(9) |
| Cd(2)-O(4B)  | 2.268(6) |
| Cd(2)-O(3)   | 2.306(3) |
| Cd(2)-O(5B)  | 2.366(6) |
| Cd(2)-N(3)   | 2.375(4) |

|                    |            |
|--------------------|------------|
| O(1)-Cd(1)-O(2)    | 169.25(12) |
| O(1)-Cd(1)-N(2)    | 114.37(14) |
| O(2)-Cd(1)-N(2)    | 73.58(13)  |
| O(1)-Cd(1)-N(1)    | 73.13(12)  |
| O(2)-Cd(1)-N(1)    | 112.97(13) |
| N(2)-Cd(1)-N(1)    | 103.73(13) |
| O(1)-Cd(1)-O(3)    | 93.06(11)  |
| O(2)-Cd(1)-O(3)    | 78.06(11)  |
| N(2)-Cd(1)-O(3)    | 150.96(13) |
| N(1)-Cd(1)-O(3)    | 92.86(11)  |
| O(1)-Cd(1)-O(3)#1  | 74.63(10)  |
| O(2)-Cd(1)-O(3)#1  | 97.53(11)  |
| N(2)-Cd(1)-O(3)#1  | 98.19(11)  |
| N(1)-Cd(1)-O(3)#1  | 146.31(12) |
| O(3)-Cd(1)-O(3)#1  | 79.31(10)  |
| O(4A)-Cd(2)-O(2)   | 105.4(7)   |
| O(4A)-Cd(2)-O(1)#1 | 103.5(9)   |
| O(2)-Cd(2)-O(1)#1  | 95.82(12)  |
| O(4A)-Cd(2)-O(5A)  | 49.7(8)    |
| O(2)-Cd(2)-O(5A)   | 152.2(9)   |
| O(1)#1-Cd(2)-O(5A) | 101.7(13)  |
| O(4A)-Cd(2)-O(4B)  | 10.2(9)    |
| O(2)-Cd(2)-O(4B)   | 115.6(4)   |
| O(1)#1-Cd(2)-O(4B) | 102.5(5)   |
| O(5A)-Cd(2)-O(4B)  | 39.6(7)    |
| O(4A)-Cd(2)-O(3)   | 174.1(7)   |
| O(2)-Cd(2)-O(3)    | 80.46(11)  |
| O(1)#1-Cd(2)-O(3)  | 76.46(11)  |
| O(5A)-Cd(2)-O(3)   | 124.4(6)   |
| O(4B)-Cd(2)-O(3)   | 163.9(4)   |

|                     |            |
|---------------------|------------|
| O(4A)-Cd(2)-O(5B)   | 68.3(8)    |
| O(2)-Cd(2)-O(5B)    | 167.6(4)   |
| O(1)#1-Cd(2)-O(5B)  | 96.1(4)    |
| O(5A)-Cd(2)-O(5B)   | 18.8(7)    |
| O(4B)-Cd(2)-O(5B)   | 58.2(3)    |
| O(3)-Cd(2)-O(5B)    | 105.7(3)   |
| O(4A)-Cd(2)-N(3)    | 106.7(8)   |
| O(2)-Cd(2)-N(3)     | 91.51(12)  |
| O(1)#1-Cd(2)-N(3)   | 145.71(12) |
| O(5A)-Cd(2)-N(3)    | 86.0(11)   |
| O(4B)-Cd(2)-N(3)    | 104.4(4)   |
| O(3)-Cd(2)-N(3)     | 71.81(11)  |
| O(5B)-Cd(2)-N(3)    | 80.5(3)    |
| C(18)-O(1)-Cd(1)    | 117.0(3)   |
| C(18)-O(1)-Cd(2)#1  | 129.3(3)   |
| Cd(1)-O(1)-Cd(2)#1  | 109.08(13) |
| C(1)-O(2)-Cd(1)     | 115.5(3)   |
| C(1)-O(2)-Cd(2)     | 136.7(3)   |
| Cd(1)-O(2)-Cd(2)    | 104.64(13) |
| C(35)-O(3)-Cd(2)    | 111.5(2)   |
| C(35)-O(3)-Cd(1)    | 112.2(2)   |
| Cd(2)-O(3)-Cd(1)    | 96.82(10)  |
| C(35)-O(3)-Cd(1)#1  | 130.4(3)   |
| Cd(2)-O(3)-Cd(1)#1  | 99.69(10)  |
| Cd(1)-O(3)-Cd(1)#1  | 100.69(10) |
| C(24)-N(1)-C(23)    | 119.9(4)   |
| C(24)-N(1)-Cd(1)    | 129.6(3)   |
| C(23)-N(1)-Cd(1)    | 109.8(3)   |
| C(7)-N(2)-C(6)      | 119.0(5)   |
| C(7)-N(2)-Cd(1)     | 128.8(4)   |
| C(6)-N(2)-Cd(1)     | 111.9(3)   |
| C(41)-N(3)-C(40)    | 120.9(4)   |
| C(41)-N(3)-Cd(2)    | 126.6(3)   |
| C(40)-N(3)-Cd(2)    | 110.3(3)   |
| C(53A)-O(4A)-Cd(2)  | 109.2(14)  |
| C(53A)-O(5A)-Cd(2)  | 107.9(13)  |
| O(4A)-C(53A)-O(5A)  | 93.2(18)   |
| O(4A)-C(53A)-C(52A) | 103.8(19)  |
| O(5A)-C(53A)-C(52A) | 158(3)     |
| C(53B)-O(4B)-Cd(2)  | 93.0(7)    |
| C(53B)-O(5B)-Cd(2)  | 88.6(7)    |
| O(5B)-C(53B)-O(4B)  | 120.2(10)  |
| O(5B)-C(53B)-C(52B) | 123.6(13)  |
| O(4B)-C(53B)-C(52B) | 115.7(11)  |

---

Symmetry transformations used to generate equivalent atoms:

#1 -x, -y+2, -z+2

### 1.3. Table S3. Selected Bond lengths [Å] and angles [°] for 3.

---

|                    |            |
|--------------------|------------|
| I(1)-Cd(1)         | 2.7159(8)  |
| Cd(1)-O(1)         | 2.225(5)   |
| Cd(1)-O(2)#1       | 2.257(5)   |
| Cd(1)-O(3)         | 2.343(5)   |
| Cd(1)-N(1)         | 2.371(6)   |
| Cd(2)-O(2)         | 2.206(4)   |
| Cd(2)-O(3)         | 2.239(4)   |
| Cd(2)-O(1)         | 2.293(5)   |
| Cd(2)-N(3)         | 2.351(5)   |
| Cd(2)-N(2)         | 2.387(6)   |
| O(2)-Cd(1)#1       | 2.257(5)   |
|                    |            |
| O(1)-Cd(1)-O(2)#1  | 116.5(2)   |
| O(1)-Cd(1)-O(3)    | 70.11(17)  |
| O(2)#1-Cd(1)-O(3)  | 75.92(17)  |
| O(1)-Cd(1)-N(1)    | 73.72(18)  |
| O(2)#1-Cd(1)-N(1)  | 108.01(19) |
| O(3)-Cd(1)-N(1)    | 140.69(17) |
| O(1)-Cd(1)-I(1)    | 133.31(18) |
| O(2)#1-Cd(1)-I(1)  | 106.98(12) |
| O(3)-Cd(1)-I(1)    | 106.92(12) |
| N(1)-Cd(1)-I(1)    | 108.88(14) |
| O(2)-Cd(2)-O(3)    | 138.72(18) |
| O(2)-Cd(2)-O(1)    | 97.12(19)  |
| O(3)-Cd(2)-O(1)    | 70.78(17)  |
| O(2)-Cd(2)-N(3)    | 124.52(19) |
| O(3)-Cd(2)-N(3)    | 73.80(17)  |
| O(1)-Cd(2)-N(3)    | 138.05(19) |
| O(2)-Cd(2)-N(2)    | 72.35(19)  |
| O(3)-Cd(2)-N(2)    | 146.8(2)   |
| O(1)-Cd(2)-N(2)    | 98.36(19)  |
| N(3)-Cd(2)-N(2)    | 99.0(2)    |
| C(1)-O(1)-Cd(1)    | 117.4(4)   |
| C(1)-O(1)-Cd(2)    | 130.0(4)   |
| Cd(1)-O(1)-Cd(2)   | 110.6(2)   |
| C(18)-O(2)-Cd(2)   | 117.9(4)   |
| C(18)-O(2)-Cd(1)#1 | 133.8(4)   |
| Cd(2)-O(2)-Cd(1)#1 | 108.02(18) |

|                  |            |
|------------------|------------|
| C(35)-O(3)-Cd(2) | 116.1(4)   |
| C(35)-O(3)-Cd(1) | 126.7(4)   |
| Cd(2)-O(3)-Cd(1) | 108.37(19) |
| C(9)-N(1)-C(6)   | 119.0(6)   |
| C(9)-N(1)-Cd(1)  | 129.0(5)   |
| C(6)-N(1)-Cd(1)  | 112.0(4)   |
| C(26)-N(2)-C(23) | 118.7(6)   |
| C(26)-N(2)-Cd(2) | 128.4(5)   |
| C(23)-N(2)-Cd(2) | 112.2(5)   |
| C(43)-N(3)-C(40) | 120.6(6)   |
| C(43)-N(3)-Cd(2) | 127.7(4)   |
| C(40)-N(3)-Cd(2) | 111.7(4)   |

---

Symmetry transformations used to generate equivalent atoms:

#1 -x, y, -z+1/2

2.1. Fig. S1. Views of the coordination geometries of Cd(II) atoms in 1 (H atoms omitted for clarity).

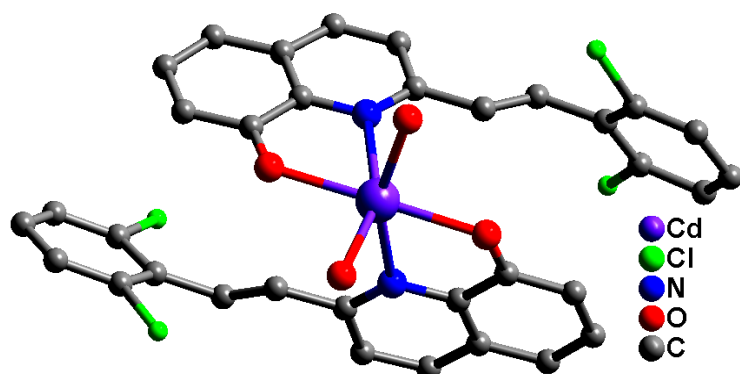

2.2. Fig. S2. Perspective views of intramolecular hydrogen bonding in 1 (H atoms omitted for clarity).

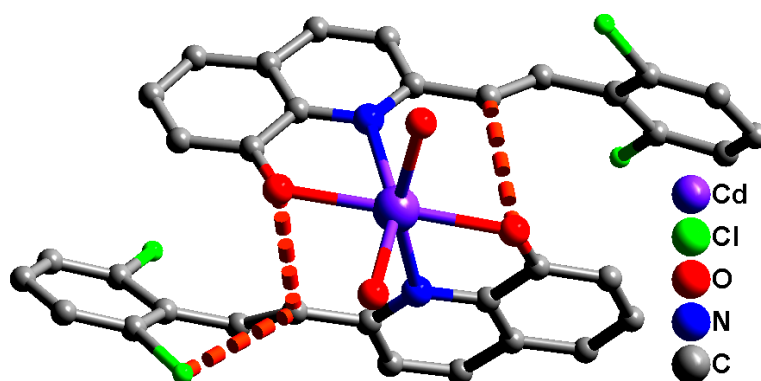

2.3. Fig. S3. Perspective views of intermolecular C-H...Cl interaction in 1 (H atoms omitted for clarity).

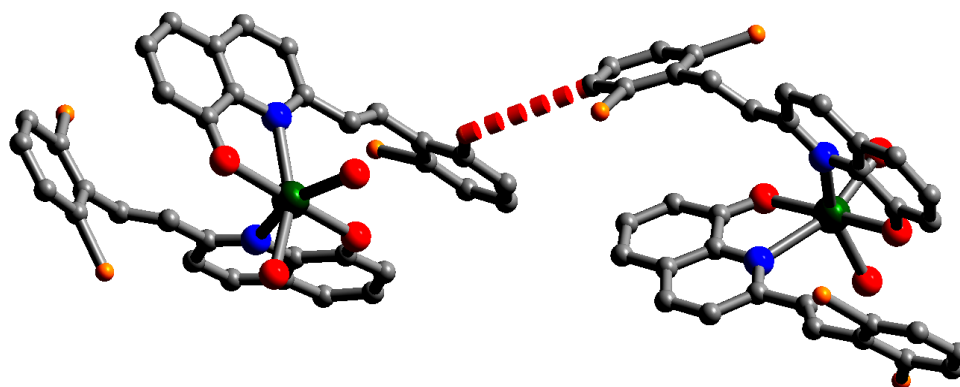

2.4. Fig. S4. Perspective views of intermolecular C-Cl $\cdots$  $\pi$  interaction in 1 (H atoms omitted for clarity).

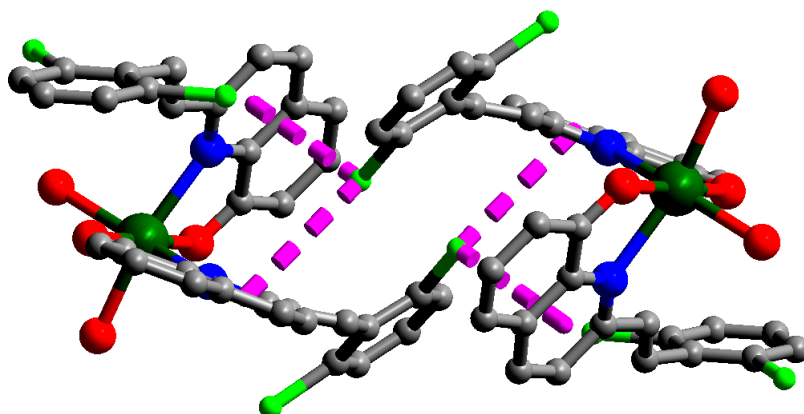

2.5. Fig. S5. Perspective views of intermolecular C-H $\cdots$  $\pi$  interaction in 1 (H atoms omitted for clarity).

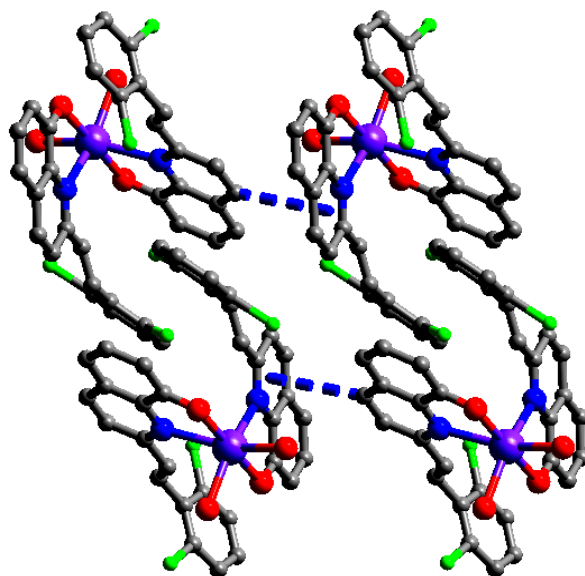

2.6. Fig. S6. Views of intermolecular hydrogen bonding between O-H groups of methanol and O atoms of quinoline units in 1

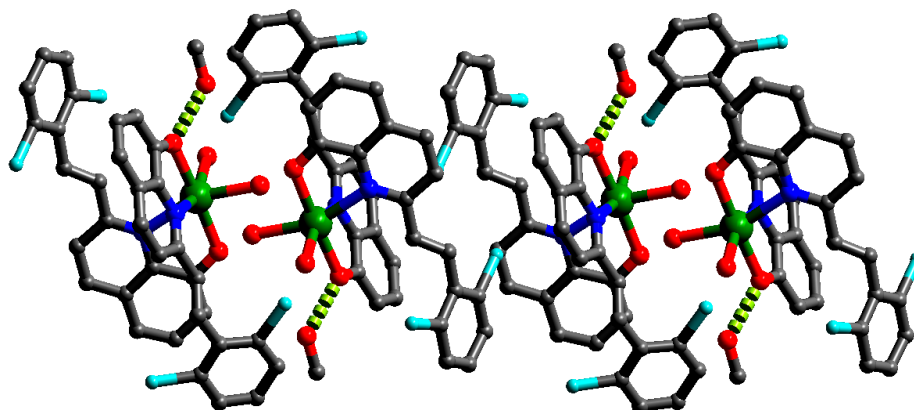



3.1. Fig. S7. Views of the coordination geometries of Cd(II) atoms in 2 (H atoms omitted for clarity).

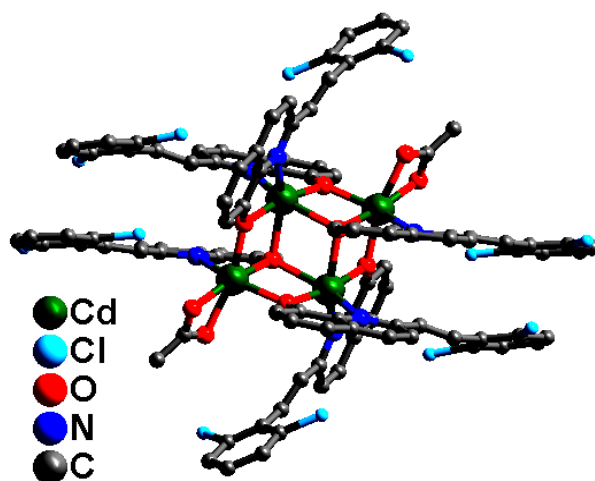

3.2. Fig. S8. Perspective views of intramolecular interaction ( $C-H\cdots Cl$  and  $\pi\cdots\pi$  stacking) in 2, H atoms omitted for clarity.

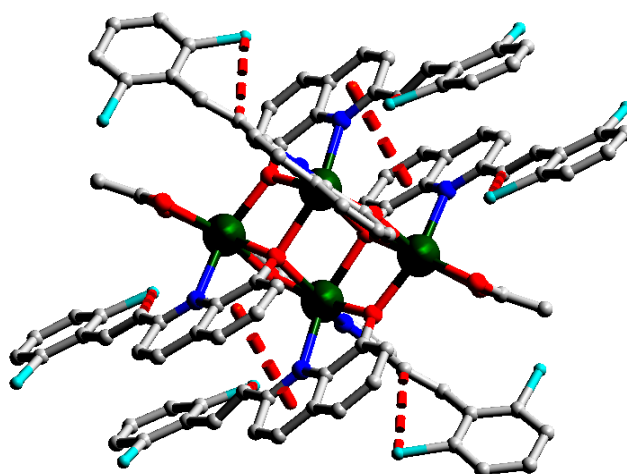

3.3. Fig. S9. Perspective views of intermolecular  $C-Cl_2\cdots Cl_3-C$  interactions in 2 along c axis (H atoms omitted for clarity).

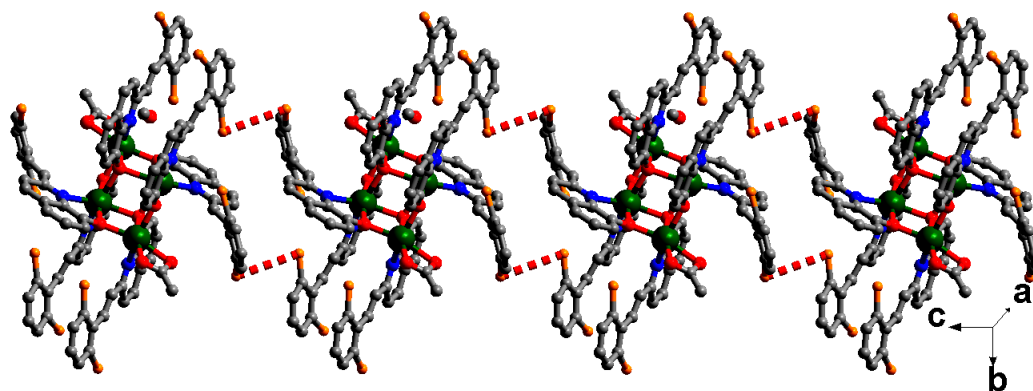

4.1. Fig. S10. Views of the coordination geometries of Cd(II) atoms in **3** (H atoms omitted for clarity).

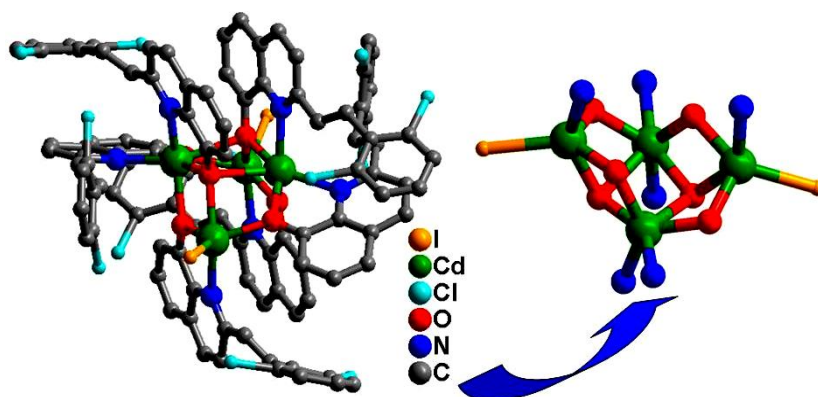

4.2. Fig. S11. Perspective views of intramolecular  $\pi$ ... $\pi$  stacking interaction in **3**, H atoms omitted for clarity.

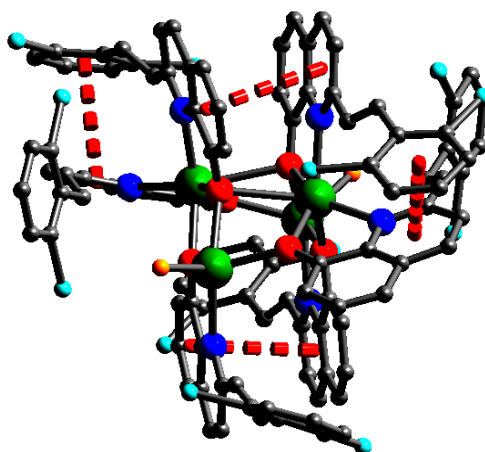

4.3. Fig. S12. Perspective views of intermolecular C(8)–H(8A)...Cl(4) interactions in **3** (H atoms omitted for clarity).

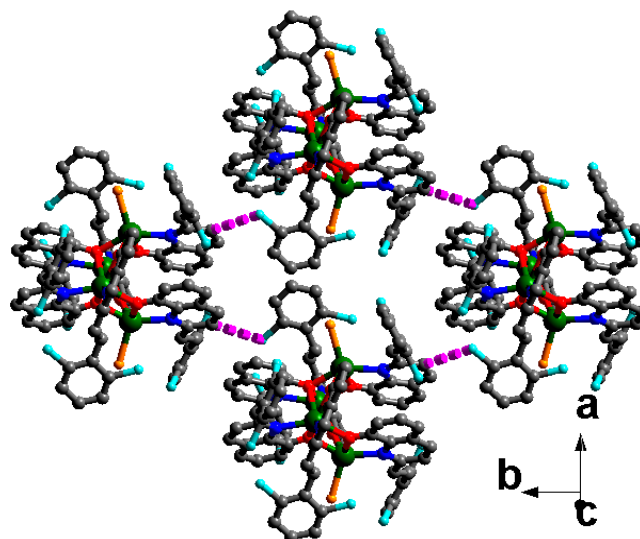

Supplement: c3ce40348c.pdf [file c3ce40348c.pdf]
